# Supplementary material for: Iron and nickel co-doped cobalt hydroxide nanosheets with enhanced activity for oxygen evolution reaction
Source: Royal Society of Chemistry journal article supplement (doi:10.1039/c6ra02766k), 2016-01-01
Supplement: c6ra02766k1.pdf [file c6ra02766k1.pdf]

## Iron and nickel co-doped cobalt hydroxide nanosheets with enhanced activity for oxygen evolution reaction

Guangfeng Zeng,<sup>a</sup> Mei Liao,<sup>a</sup> Caixia Zhou,<sup>a</sup> Xiaojuan Chen,<sup>b</sup> Yujue Wang,<sup>a</sup> and Dan Xiao<sup>\*ab</sup>

<sup>a</sup>College of Chemistry, Sichuan University, Chengdu 610065, P. R. China

Tel: +86-28-85415029, Fax: +86-28-85416029 Email: xiaodan@scu.edu.cn.

<sup>b</sup>College of Chemical Engineering, Sichuan University, Chengdu 610065, P. R. China

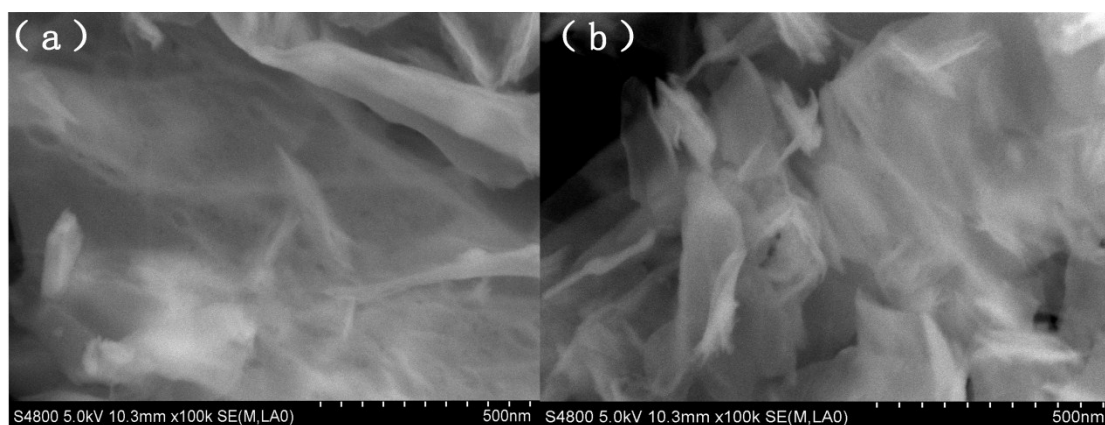

Fig S1 (a) and (b) SEM images of  $\text{Co(OH)}_2$  nanosheets

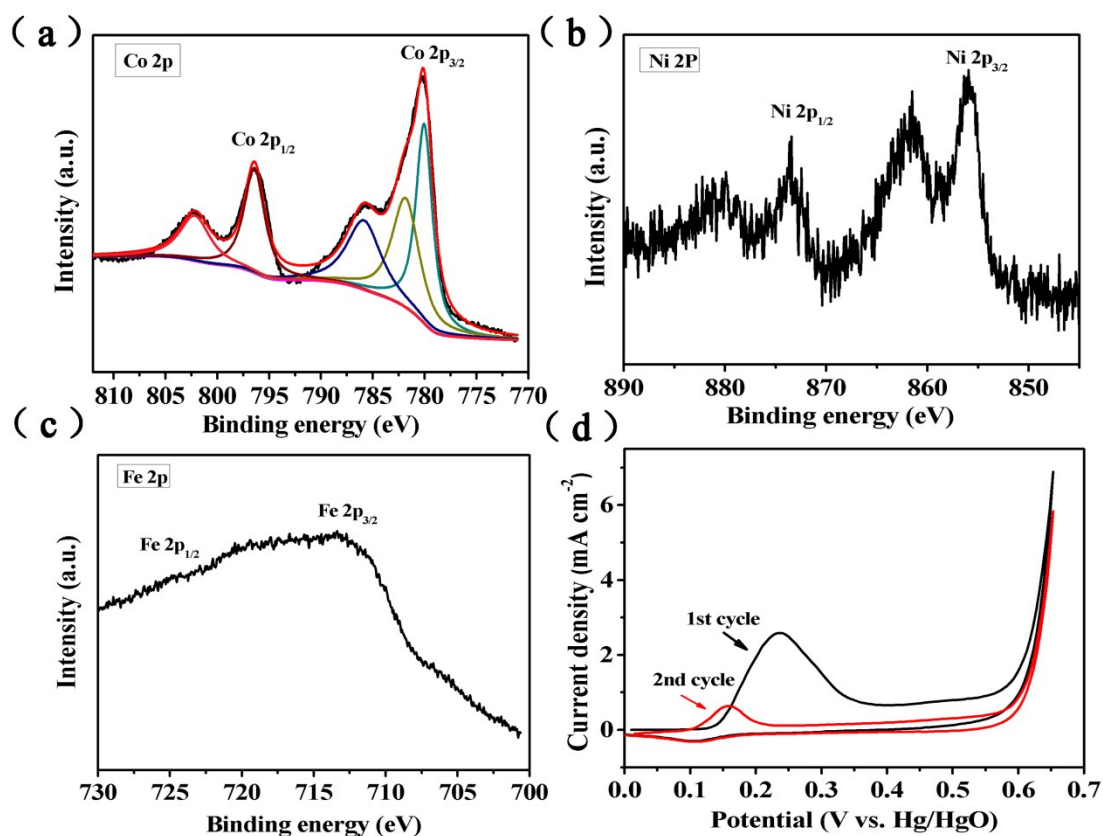

Fig S2 (a) The Co 2p deconvolution spectra; (b, c) Ni 2p and Fe 2p spectra of Co-Ni-Fe511 catalyst after OER test; (d) The CV cycles of Co(OH)<sub>2</sub> at scan rates of 10 mV s<sup>-1</sup>.

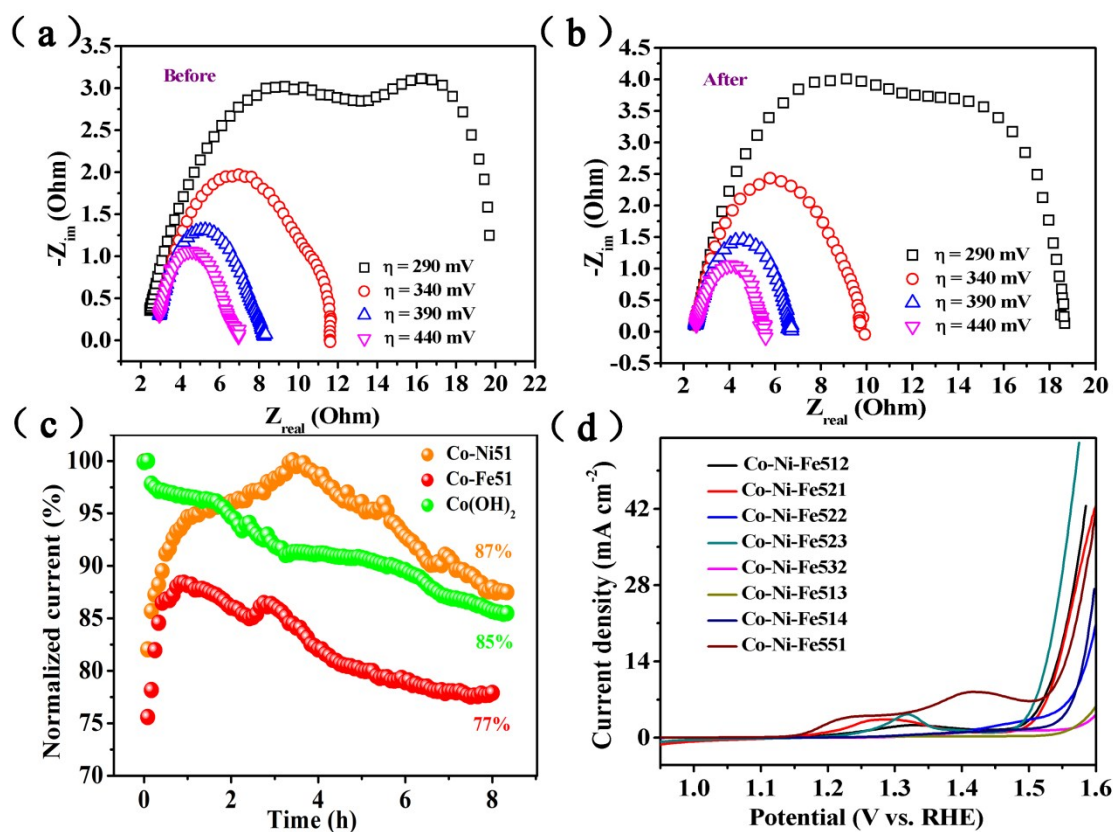

Fig S3 (a, b) The EIS measurements of the Co-Ni-Fe511 catalyst before and after stability at

different overpotential; (c) the stability test of Co-Ni51, Co-Fe51 and Co(OH)<sub>2</sub>; (d) Linear sweep voltammetric (LSV) curves of other ratios of iron and nickel co-doped cobalt hydroxide.

| Catalyst                   | Catalyst loading        | electrolyte           | Overpotential ( $\eta$ ) at 10 mA(mg cm <sup>-2</sup> ) | Tafel slope             | References |
|----------------------------|-------------------------|-----------------------|---------------------------------------------------------|-------------------------|------------|
| FeOOH/Au                   | —                       | 1 M KOH               | 340 mV                                                  | 46 mV dec <sup>-1</sup> | 1          |
| Ni(OH) <sub>2</sub> /NiOOH | —                       | 1 M KOH               | 280 mV                                                  | 40 mV dec <sup>-1</sup> | 2          |
| Ni-Fe (oxy)hydroxide       | —                       | 1 M KOH               | 275 mV                                                  | —                       | 3          |
| CoOOH                      | —                       | 0.1 M KOH             | 570 mV                                                  | 55 mV dec <sup>-1</sup> | 4          |
| G/NiFe                     | 0.25 mg/cm <sup>2</sup> | 0.1 M KOH             | 390 mV                                                  | 67 mV dec <sup>-1</sup> | 5          |
| $\gamma$ - CoOOH           | —                       | 1 M KOH               | 300 mV                                                  | 38 mV dec <sup>-1</sup> | 6          |
| Ni(OH) <sub>2</sub> /NiOOH | —                       | Fe-saturated 0.1M KOH | 310 mV                                                  | —                       | 7          |
| CoOOH                      | —                       | 1 M KOH               | 486 mV                                                  | 54 mV dec <sup>-1</sup> | 8          |
| Co-Ni-Fe511                | 0.12 mg/cm <sup>2</sup> | 1 M KOH               | 288 mV                                                  | 43 mV dec <sup>-1</sup> | This work  |

Table S1 Comparison of Co-Ni-Fe511 catalyst with the novel metal oxyhydroxide OER catalysts

### Notes and references

1. S. Zou, M. S. Burke, M. G. Kast, J. Fan, N. Danilovic and S. W. Boettcher, *Chemistry of Materials*, 2015, **27**, 8011-8020.
2. S. Klaus, Y. Cai, M. W. Louie, L. Trotochaud and A. T. Bell, *The Journal of Physical Chemistry C*, 2015, **119**, 7243-7254.
3. A. S. Batchellor and S. W. Boettcher, *ACS Catalysis*, 2015, **5**, 6680-6689.
4. C. S. Lim, C. K. Chua, Z. Sofer, K. Klímová, C. Boothroyd and M. Pumera, *Journal of Materials Chemistry A*, 2015, **3**, 11920-11929.
5. C. Tang, H.-F. Wang, H.-S. Wang, F. Wei and Q. Zhang, *Journal of Materials Chemistry A*, 2016, **4**, 3210-3216.

6. J. Huang, J. Chen, T. Yao, J. He, S. Jiang, Z. Sun, Q. Liu, W. Cheng, F. Hu and Y. Jiang, *Angewandte Chemie*, 2015, **127**, 8846-8851.
7. J. D. Michael, E. L. Demeter, S. M. Illes, Q. Fan, J. R. Boes and J. R. Kitchin, *The Journal of Physical Chemistry C*, 2015, **119**, 11475-11481.
8. Y. C. Liu, J. A. Koza and J. A. Switzer, *Electrochimica Acta*, 2014, **140**, 359-365.
